# Supplementary material for: LINC00623/miR-101/HRAS axis modulates IL-1β-mediated ECM degradation, apoptosis and senescence of osteoarthritis chondrocytes
Source: PubMed Central journal article supplement (PMC7066905; doi:10.18632/aging.102801), 2020-02-12
Supplement: aging-12-102801-s001..pdf [file aging-12-102801-s001..pdf]

## SUPPLEMENTARY TABLES

**Supplementary Table 1. Enrichment analysis of KEGG pathway.**

| Category     | Pathway name                | Count | Proportion% | Enrichment P-Value |
|--------------|-----------------------------|-------|-------------|--------------------|
| KEGG_PATHWAY | MAPK pathway                | 12    | 3.8         | 2.50E-04           |
| KEGG_PATHWAY | PI3K-Akt signaling pathway  | 9     | 2.9         | 5.60E-04           |
| KEGG_PATHWAY | mTOR signaling pathway      | 9     | 1.9         | 1.30E-03           |
| KEGG_PATHWAY | FoxO signaling pathway      | 8     | 2.4         | 2.00E-03           |
| KEGG_PATHWAY | HIF-1 signaling pathway     | 7     | 1.2         | 2.90E-02           |
| KEGG_PATHWAY | Ras signaling pathway       | 5     | 1           | 3.20E-02           |
| KEGG_PATHWAY | Chemokine signaling pathway | 7     | 1.7         | 3.30E-02           |

**Supplementary Table 2. LncRNAs correlated to HRAS.**

| LncRNA          | Ensemble                | Correlation efficient |
|-----------------|-------------------------|-----------------------|
| ENST00000437516 | HLA-N                   | 0.901205548           |
| ENST00000493797 | RP11-34P13.14           | 0.905231127           |
| BC041922        |                         | 0.90593243            |
| AK311036        | lincRNA-ANKDD1A         | 0.910861733           |
| NR_024566       | ZNF271P                 | 0.921351673           |
| BI522654        | lincRNA-SLC20A1-1       | 0.922856812           |
| NR_027155       | LOC100271836(SMG1P3)    | 0.927245685           |
| NR_028326       | LOC100133161(LINC01001) | 0.93014676            |
| HIT000332083    |                         | 0.938368285           |
| uc002blm.2      | DQ598270                | 0.943346258           |
| NR_024510       | LOC728855(LINC00623)    | 0.953859386           |
